# Supplementary material for: Enhanced CRISPR-Cas9 correction of Duchenne muscular dystrophy in mice by a self-complementary AAV delivery system
Source: PubMed Central journal article supplement — Sci Adv. 2020 Feb 19;6(8):eaay6812. doi: 10.1126/sciadv.aay6812 (PMC7030925; doi:10.1126/sciadv.aay6812), 2020-02-19
Supplement: aay6812_SM.pdf [file aay6812_SM.pdf]

## Supplementary Materials for

### Enhanced CRISPR-Cas9 correction of Duchenne muscular dystrophy in mice by a self-complementary AAV delivery system

Yu Zhang, Hui Li, Yi-Li Min, Efrain Sanchez-Ortiz, Jian Huang, Alex A. Mireault, John M. Shelton, Jiwoong Kim, Pradeep P. A. Mammen, Rhonda Bassel-Duby, Eric N. Olson\*

\*Corresponding author. Email: eric.olson@utsouthwestern.edu

Published 19 February 2020, *Sci. Adv.* **6**, eaay6812 (2020)  
DOI: 10.1126/sciadv.aay6812

#### This PDF file includes:

- Fig. S1. Alkaline denaturing gel electrophoresis confirms integrity of AAV vectors.
- Fig. S2. Systemic delivery of CRISPR-Cas9 genome editing components by single-stranded AAV vector to  $\Delta$ Ex44 mice rescues dystrophin expression.
- Fig. S3. Whole muscle scanning of immunohistochemistry of TA, triceps, diaphragm, and heart of CRISPR-Cas9–corrected  $\Delta$ Ex44 mice.
- Fig. S4. Western blot analysis of skeletal muscles and heart of  $\Delta$ Ex44 mice treated with ssAAV-packaged CRISPR-Cas9 genome editing components.
- Fig. S5. Muscle histology of  $\Delta$ Ex44 mice after systemic delivery of AAV expressing CRISPR-Cas9 genome editing components.
- Fig. S6. Whole-muscle scanning of H&E staining of TA, triceps, diaphragm, and heart of CRISPR-Cas9–corrected  $\Delta$ Ex44 mice.
- Fig. S7. Serum CK analysis of CRISPR-Cas9–corrected  $\Delta$ Ex44 mice.
- Fig. S8.  $\Delta$ Ex44 mice express more Cas9 and sgRNA transcripts after systemic delivery of scAAV-packaged sgRNA.
- Table S1. Deep sequencing analysis of CRISPR-Cas9–corrected  $\Delta$ Ex44 mice.
- Table S2. Primers used in this study.

## Supplementary Materials

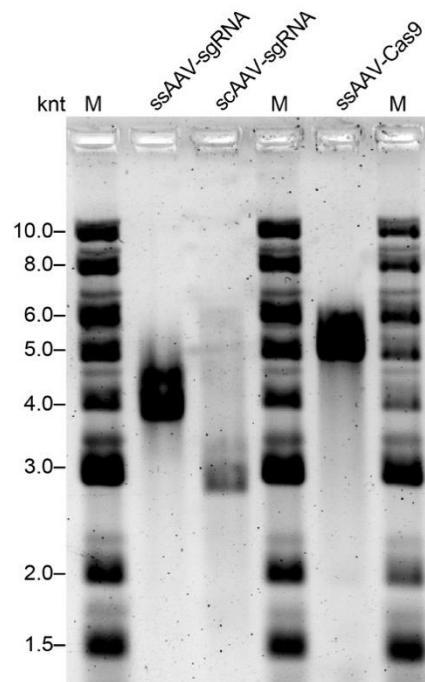

**Fig. S1. Alkaline denaturing gel electrophoresis confirms integrity of AAV vectors.** The viral genomes of the Cas9 vector and sgRNA vectors were analyzed by gel electrophoresis under alkaline denaturing conditions. The size of ssAAV-sgRNA and ssAAV-Cas9 is 3.9 and 5.1 knt, respectively, and remains unchanged after alkaline gel electrophoresis. The size of scAAV-sgRNA is 1.4 kilo-base pair and is doubled to 2.8 knts under denaturing conditions, indicating its double-stranded viral genome. M, marker; knt, kilo-nucleotides.

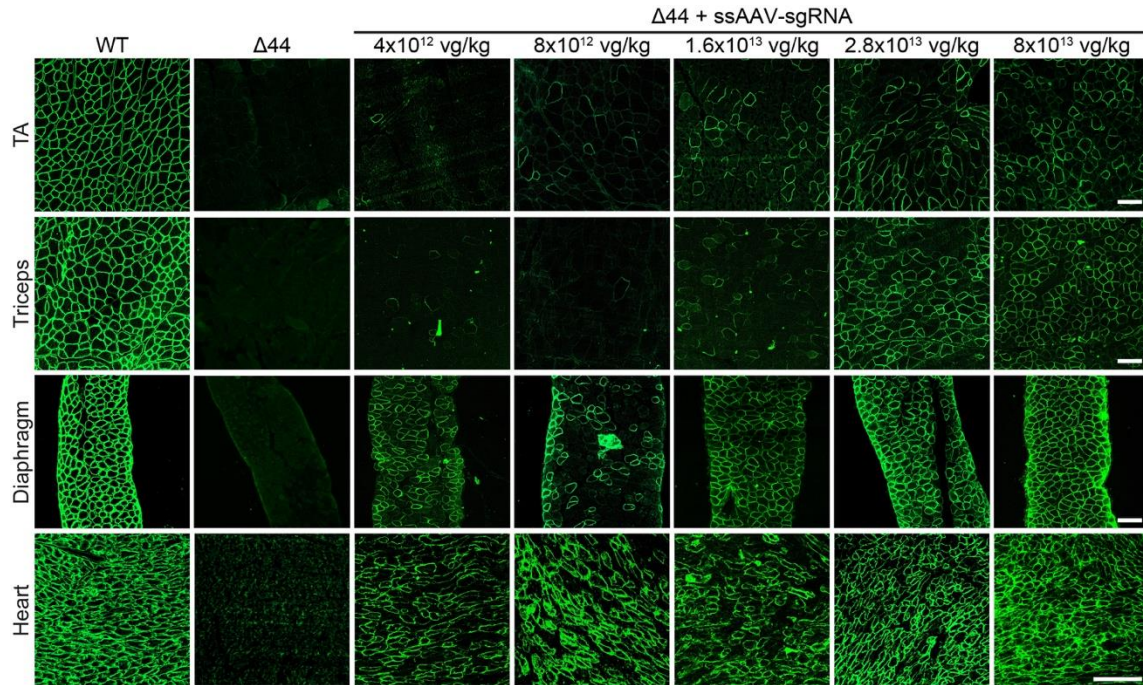

**Fig. S2. Systemic delivery of CRISPR-Cas9 genome editing components by single-stranded AAV vector to  $\Delta$ Ex44 mice rescues dystrophin expression.** Immunohistochemistry shows restoration of dystrophin in tibialis anterior (TA), triceps, diaphragm, and heart of  $\Delta$ Ex44 mice 4 weeks after systemic delivery of ssAAV-packaged *SpCas9* and ssAAV-packaged sgRNA. *SpCas9* vector was kept at constant dose of  $8 \times 10^{13}$  vg/kg. The dose of sgRNA vector was shown in the figure. Dystrophin is shown in green.  $n = 5$  for each muscle group. Scale bar, 100  $\mu$ m.

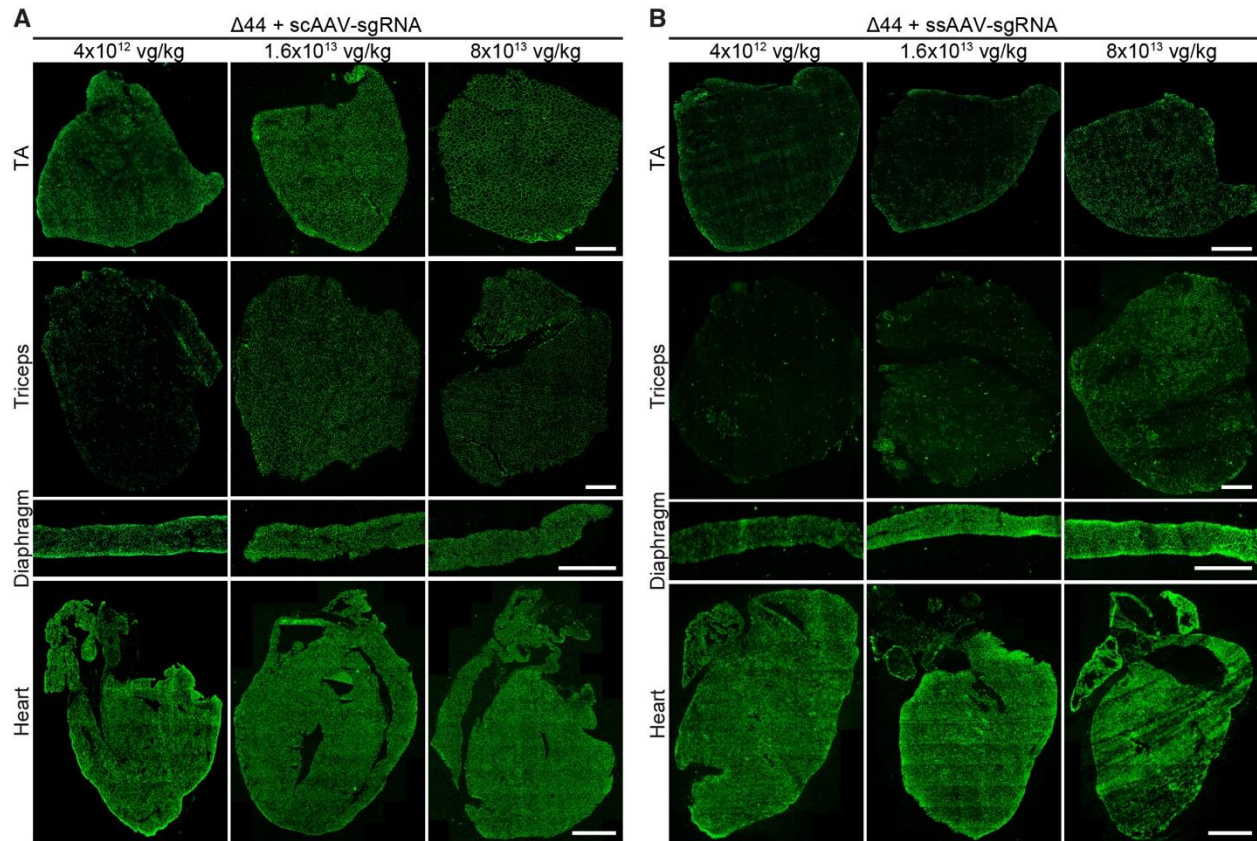

**Fig. S3. Whole muscle scanning of immunohistochemistry of TA, triceps, diaphragm, and heart of CRISPR-Cas9–corrected  $\Delta\text{Ex}44$  mice.** (A and B) Whole muscle scanning of TA, triceps, diaphragm, and heart of  $\Delta\text{Ex}44$  mice 4 weeks after systemic delivery of ssAAV-packaged *SpCas9* and scAAV-packaged sgRNA (A) or ssAAV-packaged sgRNA (B). *SpCas9* vector was kept at constant dose of  $8 \times 10^{13} \text{ vg/kg}$ . The dose of sgRNA vector was shown in the figure. Dystrophin is shown in green.  $n = 5$  for each muscle group. Scale bar in TA, triceps, diaphragm is  $500 \mu\text{m}$ , in heart is  $1.5\text{mm}$ .

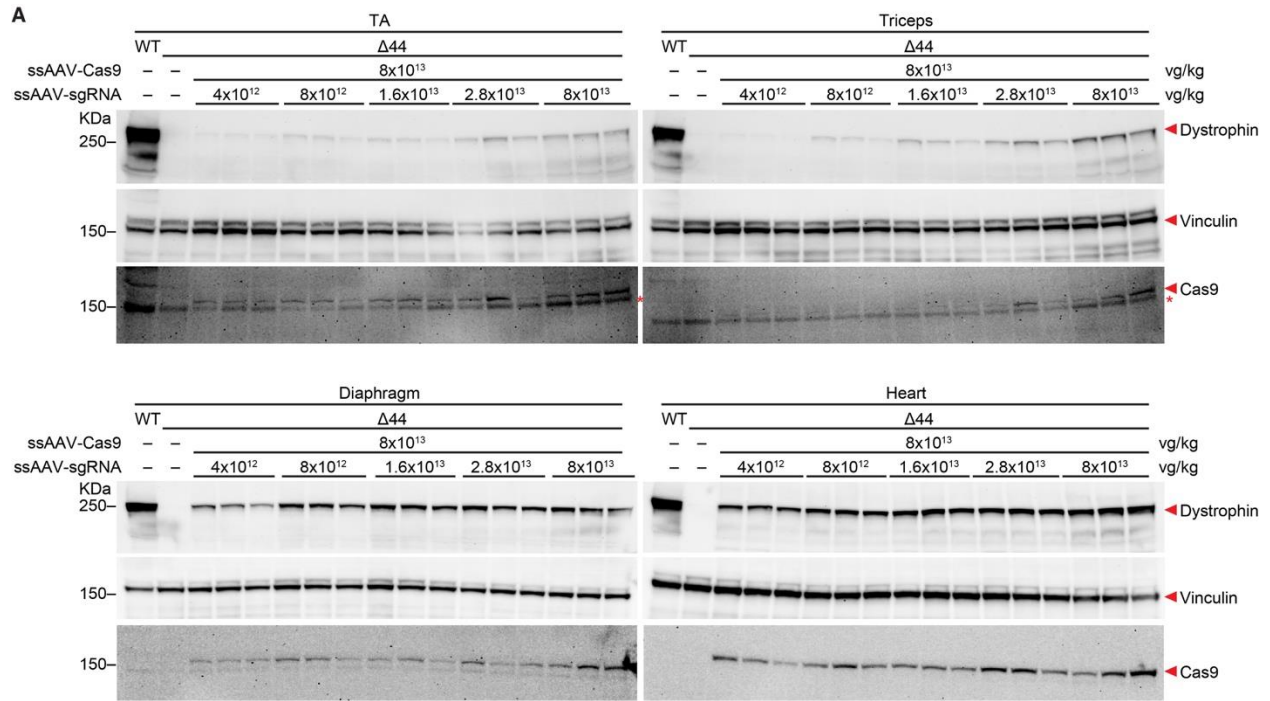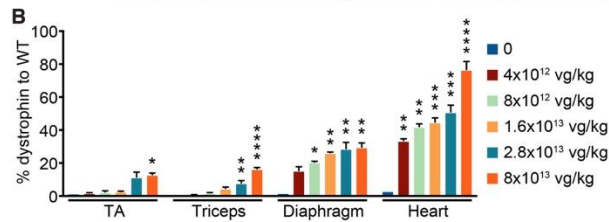

**Fig. S4. Western blot analysis of skeletal muscles and heart of  $\Delta Ex44$  mice treated with ssAAV-packaged CRISPR-Cas9 genome editing components.** (A) Western blot analysis shows restoration of dystrophin expression in the TA, triceps, diaphragm, and heart of  $\Delta Ex44$  mice 4 weeks after systemic delivery of ssAAV-packaged *SpCas9* and ssAAV-packaged sgRNA. *SpCas9* vector was kept at constant dose of  $8 \times 10^{13}$  vg/kg. The dose of sgRNA vector was shown in the figure. Vinculin was used as the loading control (n = 3). Red asterisks indicates non-specific band. (B) Quantification of dystrophin expression in TA, triceps, diaphragm, and heart. Relative dystrophin intensity was calibrated with vinculin internal control before normalizing to the WT control. Data are represented as mean  $\pm$  SEM. One-way ANOVA was performed with post-hoc Tukey's multiple comparisons test. \*P<0.05, \*\*P<0.005, \*\*\*P<0.001, \*\*\*\*P<0.0001 (n=3).

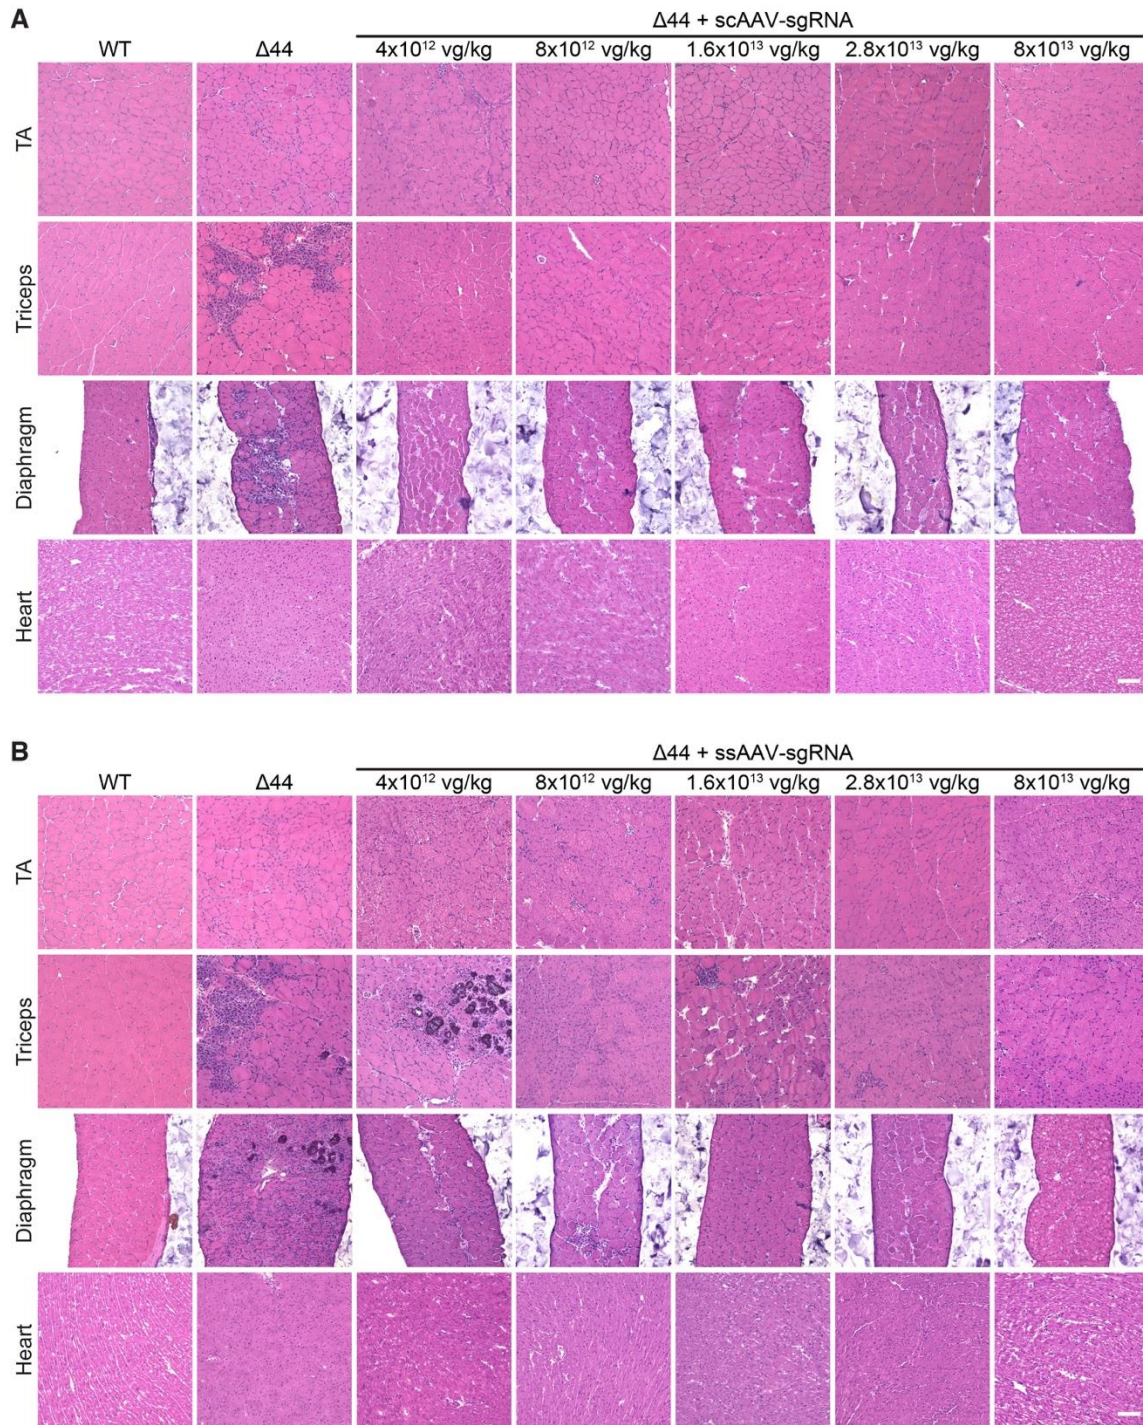

**Fig. S5. Muscle histology of  $\Delta\text{Ex}44$  mice after systemic delivery of AAV expressing CRISPR-Cas9 genome editing components. (A and B) H&E staining of TA, triceps, diaphragm, and heart of  $\Delta\text{Ex}44$  mice 4 weeks after systemic delivery of ssAAV-packaged *SpCas9* and scAAV-packaged sgRNA (A) or ssAAV-packaged sgRNA (B). *SpCas9* vector was**

kept at constant dose of  $8 \times 10^{13}$  vg/kg. The dose of sgRNA vector was shown in the figure. n = 5 for each muscle group. Scale bar, 100  $\mu$ m.

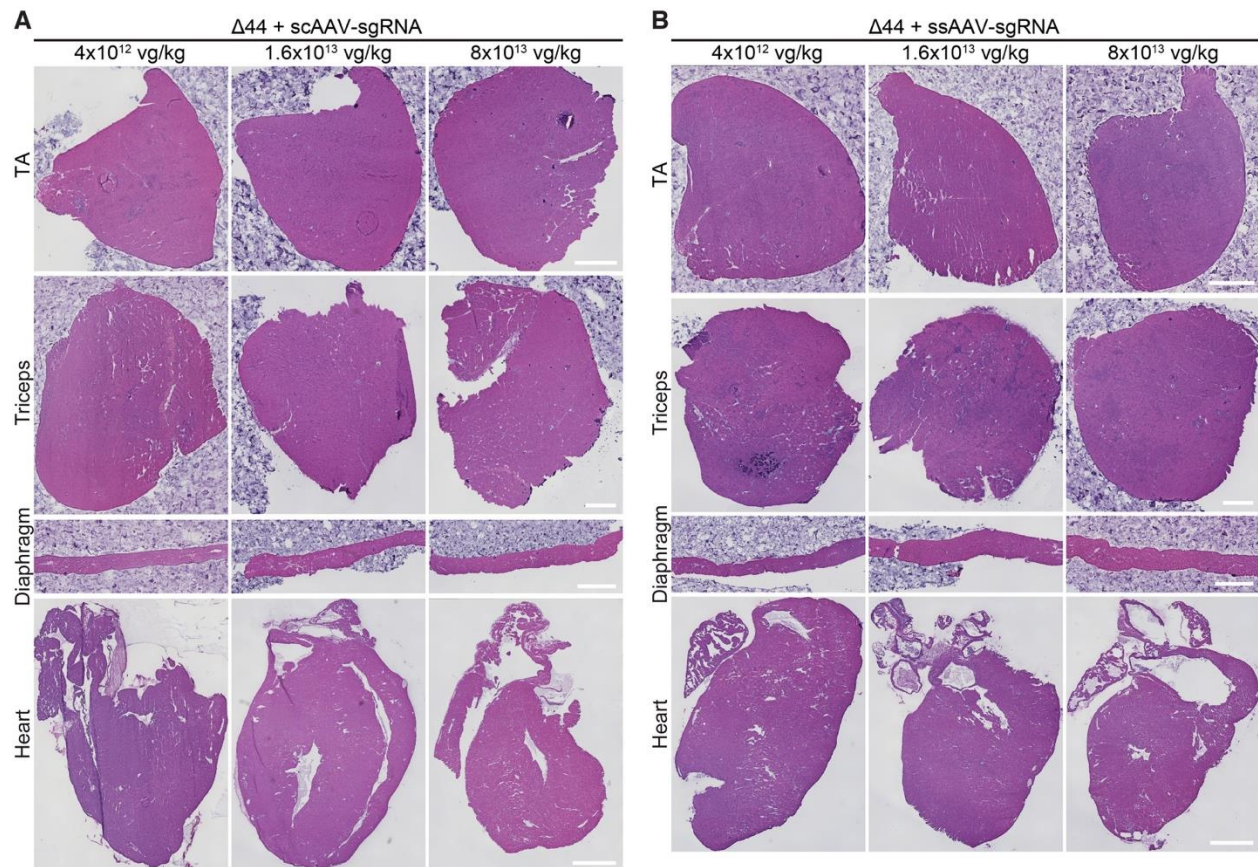

**Fig. S6. Whole-muscle scanning of H&E staining of TA, triceps, diaphragm, and heart of CRISPR-Cas9–corrected  $\Delta$ Ex44 mice. (A and B) Whole muscle scanning of H&E staining of TA, triceps, diaphragm, and heart of  $\Delta$ Ex44 mice 4 weeks after systemic delivery of ssAAV-packaged *SpCas9* and scAAV-packaged sgRNA (A) or ssAAV-packaged sgRNA (B). *SpCas9* vector was kept at constant dose of  $8 \times 10^{13}$  vg/kg. The dose of sgRNA vector was shown in the figure. n = 5 for each muscle group. Scale bar in TA, triceps, diaphragm is 500  $\mu$ m, in heart is 1.5mm.**

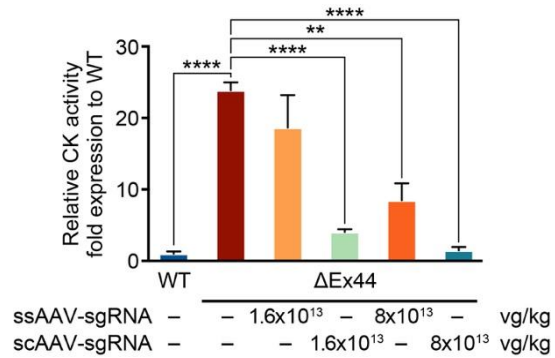

**Fig. S7. Serum CK analysis of CRISPR-Cas9–corrected  $\Delta$ Ex44 mice.** Serum CK was measured in WT,  $\Delta$ Ex44 mice untreated, and  $\Delta$ Ex44 mice 4 weeks after treatment with ssAAV-packaged *SpCas9* and scAAV or ssAAV-packaged sgRNA. *SpCas9* vector was kept at constant dose of  $8 \times 10^{13}$  vg/kg. The dose of sgRNA vector was shown in the figure. Serum CK was normalized to WT mice and shown as fold expression. Data are represented as mean  $\pm$  SEM. One-way ANOVA was performed with post-hoc Tukey’s multiple comparisons test. \*\*P<0.005, \*\*\*\*P<0.0001 (n=5).



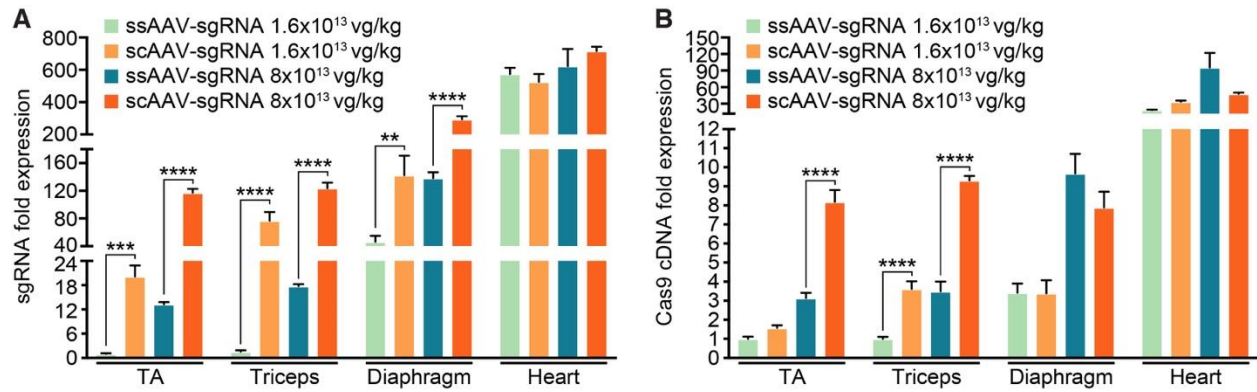

**Fig. S8.  $\Delta$ Ex44 mice express more Cas9 and sgRNA transcripts after systemic delivery of scAAV-packaged sgRNA.** (A and B) sgRNA cDNA transcripts (A) and Cas9 cDNA transcripts (B) were detected by quantitative RT-PCR from skeletal muscles and heart of  $\Delta$ Ex44 mice 4 weeks after systemic delivery of ssAAV-packaged *SpCas9* and scAAV or ssAAV-packaged sgRNA. *SpCas9* vector was kept at constant dose of  $8 \times 10^{13}$  vg/kg. The dose of sgRNA vector was shown in the figure. Both sgRNA (A) and Cas9 (B) cDNA transcripts were calibrated with 18s internal control before normalizing to the muscle group with lowest sgRNA transcripts. In both analyses, TA muscle treated with a low dose of ssAAV-packaged sgRNA ( $1.6 \times 10^{13}$  vg/kg) had the lowest sgRNA and Cas9 cDNA transcripts compared to other muscle groups. Data are represented as mean  $\pm$  SEM. One-way ANOVA was performed with post-hoc Tukey's multiple comparisons test. \*\* $P < 0.005$ , \*\*\* $P < 0.001$ , \*\*\*\* $P < 0.0001$  (n=3).

**Table S1. Deep sequencing analysis of CRISPR-Cas9–corrected  $\Delta$ Ex44 mice.**

| Dose (vg/kg) | Treatment   | Analyzed Muscle | Samples   | Barcode | Total Reads | Non-edited % | Total NHEJ % | NHEJ (+1 nt) % | ITR Integration % |
|--------------|-------------|-----------------|-----------|---------|-------------|--------------|--------------|----------------|-------------------|
| 1.60E+13     | ssAAV-sgRNA | TA              | BC2-ss58  | TGGTCA  | 265,313     | 94.59        | 5.41         | 0.85           | <0.2              |
|              |             |                 | BC3-ss59  | CACTGT  | 430,500     | 94.77        | 5.23         | 0.69           | <0.2              |
|              |             |                 | BC4-ss60  | ATTGGC  | 343,805     | 95.69        | 4.31         | 0.34           | <0.2              |
|              |             | Triceps         | BC10-ss58 | AGCTAG  | 336,778     | 94.97        | 5.03         | 0.25           | <0.2              |
|              |             |                 | BC11-ss59 | GTCGTC  | 339,549     | 94.39        | 5.61         | 1.18           | <0.2              |
|              |             |                 | BC12-ss60 | CGATTA  | 322,347     | 95.02        | 4.98         | 0.32           | <0.2              |
|              |             | Diaphragm       | BC18-ss58 | ATCAGT  | 423,848     | 86.51        | 13.49        | 5.64           | <0.2              |
|              |             |                 | BC19-ss59 | TATACT  | 508,066     | 89.32        | 10.68        | 3.65           | <0.2              |
|              |             |                 | BC20-ss60 | CAACAA  | 297,096     | 90.79        | 9.21         | 2.77           | <0.2              |
|              |             | Heart           | BC26-ss58 | AATGGT  | 414,968     | 81.29        | 18.71        | 7.84           | <0.2              |
|              |             |                 | BC27-ss59 | GGCGGT  | 314,206     | 83.56        | 16.44        | 6.36           | <0.2              |
|              |             |                 | BC28-ss60 | ATCACG  | 444,263     | 82.25        | 17.75        | 7.99           | <0.2              |
|              | scAAV-sgRNA | TA              | BC2-sc65  | TGGTCA  | 351,570     | 87.11        | 12.89        | 8.29           | <0.2              |
|              |             |                 | BC3-sc66  | CACTGT  | 397,695     | 89.08        | 10.92        | 5.47           | <0.2              |
|              |             |                 | BC4-sc67  | ATTGGC  | 347,505     | 87.22        | 12.78        | 6.71           | 0.28              |
|              |             | Triceps         | BC10-sc65 | AGCTAG  | 445,116     | 73.92        | 26.08        | 18.96          | 0.47              |
|              |             |                 | BC11-sc66 | GTCGTC  | 391,352     | 82.71        | 17.29        | 11.15          | 0.39              |
|              |             |                 | BC12-sc67 | CGATTA  | 413,467     | 69.96        | 30.04        | 18.21          | <0.2              |
|              |             | Diaphragm       | BC18-sc65 | ATCAGT  | 445,539     | 86.61        | 13.39        | 6.32           | <0.2              |
|              |             |                 | BC19-sc66 | TATACT  | 404,070     | 82.33        | 17.67        | 10.3           | <0.2              |
|              |             |                 | BC20-sc67 | CAACAA  | 331,964     | 84.09        | 15.91        | 8.41           | <0.2              |
|              |             | Heart           | BC26-sc65 | AATGGT  | 471,201     | 79.04        | 20.96        | 12.3           | 0.35              |
|              |             |                 | BC27-sc66 | GGCGGT  | 328,191     | 86.48        | 13.52        | 7.75           | <0.2              |
|              |             |                 | BC28-sc67 | ATCACG  | 435,717     | 85.92        | 14.08        | 7.77           | 0.48              |
| 8.00E+13     | ssAAV-sgRNA | TA              | BC5-ss83  | GATCTG  | 418,020     | 91.34        | 8.66         | 2.67           | 0.24              |
|              |             |                 | BC6-ss84  | TACAAG  | 337,358     | 87.34        | 12.66        | 5.99           | 0.23              |
|              |             |                 | BC7-ss85  | CGTGAT  | 291,510     | 90.57        | 9.43         | 3.16           | <0.2              |
|              |             | Triceps         | BC13-ss83 | GAATGA  | 348,423     | 90.21        | 9.79         | 3.53           | <0.2              |
|              |             |                 | BC14-ss84 | CTTCGA  | 394,987     | 86.25        | 13.75        | 5.32           | <0.2              |
|              |             |                 | BC15-ss85 | CTCTAC  | 245,385     | 89.91        | 10.09        | 2.55           | <0.2              |
|              |             | Diaphragm       | BC21-ss83 | GTTGTT  | 339,005     | 84.47        | 15.53        | 6.11           | <0.2              |
|              |             |                 | BC22-ss84 | TCGGTT  | 335,216     | 80.78        | 19.22        | 8.98           | <0.2              |
|              |             |                 | BC23-ss85 | AGTATT  | 405,971     | 81.09        | 18.91        | 8.51           | <0.2              |
|              |             | Heart           | BC29-ss83 | CGATGT  | 349,844     | 81.33        | 18.67        | 8.33           | <0.2              |
|              |             |                 | BC30-ss84 | TTAGGC  | 329,313     | 80.97        | 19.03        | 8.32           | 0.23              |
|              |             |                 | BC31-ss85 | TGACCA  | 472,649     | 74.32        | 25.68        | 13.36          | <0.2              |
|              | scAAV-sgRNA | TA              | BC5-sc14  | GATCTG  | 294,064     | 70.91        | 29.09        | 19.76          | <0.2              |
|              |             |                 | BC6-sc15  | TACAAG  | 356,949     | 74.01        | 25.99        | 16.8           | 0.24              |
|              |             |                 | BC7-sc16  | CGTGAT  | 368,727     | 70.49        | 29.51        | 18.87          | <0.2              |
|              |             | Triceps         | BC13-sc14 | GAATGA  | 380,792     | 71.12        | 28.88        | 16.95          | 0.24              |
|              |             |                 | BC14-sc15 | CTTCGA  | 339,794     | 70.4         | 29.6         | 17.8           | 0.7               |
|              |             |                 | BC15-sc16 | CTCTAC  | 365,034     | 67.38        | 32.62        | 20.08          | <0.2              |
|              |             | Diaphragm       | BC21-sc14 | GTTGTT  | 407,519     | 77.15        | 22.85        | 13.67          | <0.2              |
|              |             |                 | BC22-sc15 | TCGGTT  | 393,010     | 78.78        | 21.22        | 11.34          | <0.2              |
|              |             |                 | BC23-sc16 | AGTATT  | 443,769     | 81.34        | 18.66        | 9.12           | <0.2              |
|              |             | Heart           | BC29-sc14 | CGATGT  | 420,871     | 85.18        | 14.82        | 7.7            | <0.2              |
|              |             |                 | BC30-sc15 | TTAGGC  | 415,579     | 84.14        | 15.86        | 7.04           | 0.64              |
|              |             |                 | BC31-sc16 | TGACCA  | 411,603     | 86.73        | 13.27        | 7.93           | 0.97              |

**Table S2. Primers used in this study.**

| Primer function                              | Primer name           | Primer sequence                                              |
|----------------------------------------------|-----------------------|--------------------------------------------------------------|
| ssAAV-sgRNA cloning primers                  | IF-SpeI-PacI-U6-F     | ATGTATACCTTCGTCAGTGTAAATTAATCAGCGTTTGAGTAAGAGCCCG            |
|                                              | IF-XbaI-KpnI-GFP-R    | GCTGGCGCGCCTTTTTCTAGAGGTACCCATGGACGAGCTGTACAAGTAAAGGC        |
| scAAV-sgRNA cloning primers                  | IF-SpeI-KpnI-U6-F     | ATGTATACCTTCGTCAGTGGTACCATCAGCGTTTGAGTAAGAGCCCG              |
|                                              | IF-XbaI-MluI-GFP-R    | GCTGGCGCGCCTTTTTCTAGAACGCGTCATGGACGAGCTGTACAAGTAAAGG         |
| AAV titer ddPCR primers                      | AAV-Cas9-ddPCR-F      | GGACTCCCGGATGAACACTAAG                                       |
|                                              | AAV-Cas9-ddPCR-R      | GTTGTTGATCTCGCGCACTTT                                        |
|                                              | AAV-Cas9-ddPCR-probe  | TGGTGTCCGATTTCCGGA                                           |
|                                              | AAV-sgRNA-ddPCR-F     | AGGGCCTATTTCCCATGATT                                         |
|                                              | AAV-sgRNA-ddPCR-R     | AAACTGCAAACACTACCCAAGAAA                                     |
|                                              | AAV-sgRNA-ddPCR-probe | TGCATATACGATACAAGGCTGTTAGAGAGA                               |
| Genomic PCR for TIDE analysis                | T7E1-mE45-g4-F        | CCCTGAGCTGAAGTGAGAGG                                         |
|                                              | T7E1-mE45-g4-R        | ACCTCTTCTCCTTTCTGCCAG                                        |
| AAV vector genome copy number quantification | AAV-Cas9-copy-F       | TGAAAGAGGACTACTTCAAGAAAATC                                   |
|                                              | AAV-Cas9-copy-R       | TTGTCCTTGATAATTTTCAGCAGATC                                   |
|                                              | AAV-sgRNA-copy-F      | CCGGAATCAAGTCCGTTTATC                                        |
|                                              | AAV-sgRNA-copy-R      | GAGCTTCAGCAGGAAATTTAACTA                                     |
| cDNA RT-PCR quantification                   | mE43-qPCR-F           | AGGTGAAAGTACAGGAAGCCGT                                       |
|                                              | mE46-qPCR-R           | CTGCTGCTCATCTCCAAGTGA                                        |
|                                              | Cas9-qPCR-F           | TGAAAGAGGACTACTTCAAGAAAATC                                   |
|                                              | Cas9-qPCR-R           | TTGTCCTTGATAATTTTCAGCAGATC                                   |
|                                              | sgRNA-qPCR-F          | GGCTTACAGGAACTCCAGGA                                         |
|                                              | sgRNA-qPCR-R          | CGACTCGGTGCCACTTTTTTC                                        |
|                                              | 18s-qPCR-F            | GTAACCCGTTGAACCCATT                                          |
|                                              | 18s-qPCR-R            | CCATCCAATCGGTAGTAGCG                                         |
| On-target deep sequencing primers            | On-target-F-Nextera   | TCGTCGGCAGCGTCAGATGTGTATAAGAGACAGCTATTGGATGTGTACATGTCAGGTTCA |
|                                              | On-target-R-Nextera   | GTCTCGTGGGCTCGGAGATGTGTATAAGAGACAGGCTCTGCTAAAAAGTCTCTGTCACC  |
|                                              | miSeq-Univ-F          | AATGATACGGCGACCACCGAGATCTACACTCGTCGGCAGCGTC                  |
|                                              | miSeq-Barcode-R       | CAAGCAGAAGACGGCATACGAGATXXXXXXGTCTCGTGGGCTCGG                |

Green: Nextera adaptor sequence

Red: Transposon end sequence

Blue: On-target primers to *Dmd* exon 45

xxxxxx: barcode sequence see table S2
